# Supplementary material for: Stress Effect of Food Matrices on Viability of Probiotic Cells During Model Digestion
Source: Preprints.org preprint supplement (doi:10.20944/preprints202107.0113.v1), 2021-07-05
Supplement: Supplementary file 1 [file supplementary]

Supplementry File

Article

Stress effect of food matrices on viability of probiotic cells during model digestion

Petra Matouskova1, Julie Hoova1 , Petr Rysavka2 and Ivana Marova 1,*

1 Brno University of Technology, Faculty of Chemistry, Purkynova 118, 61200 Brno, Czech Republic; [marova@fch.vut.cz](mailto:marova@fch.vut.cz)

2 Pharmaceutical Biotechnology, Ltd., Slezska 949/32, 12000 Prague, rysavka.petr@seznam.cz

***** Correspondence: marova@fch.vut.cz; Tel.: +420 541149419 (I.M.)

List of Figures:

**Figure S1:** Bacteria *Lactobacilus acidophilus*, *Bifidobacterium breve* and commercial probiotic mixture cultivated for 48 hours in MRS agar

**Figure S2.** Viability of probiotics analyzed by flow cytometry – results of analysis of commercial probiotic mixture incubated in water medium.

| 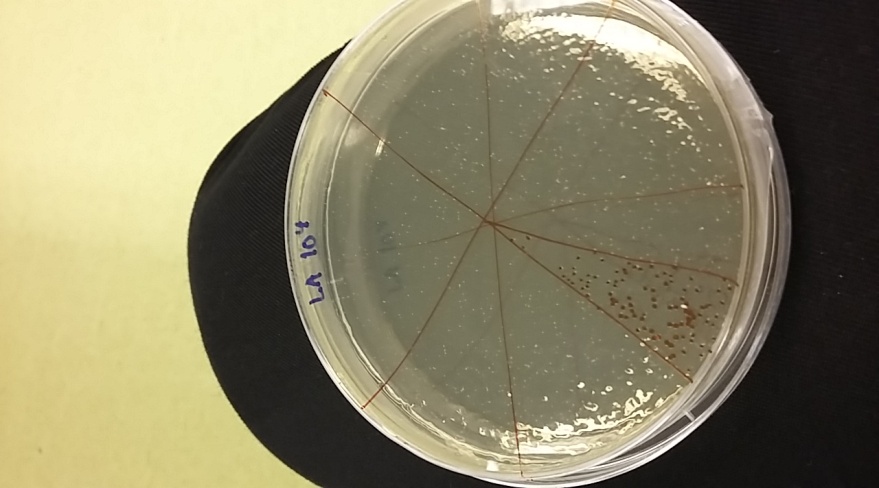 | 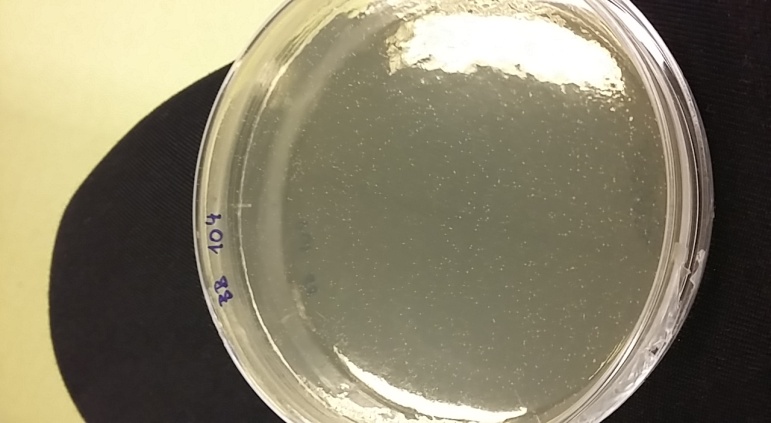 | 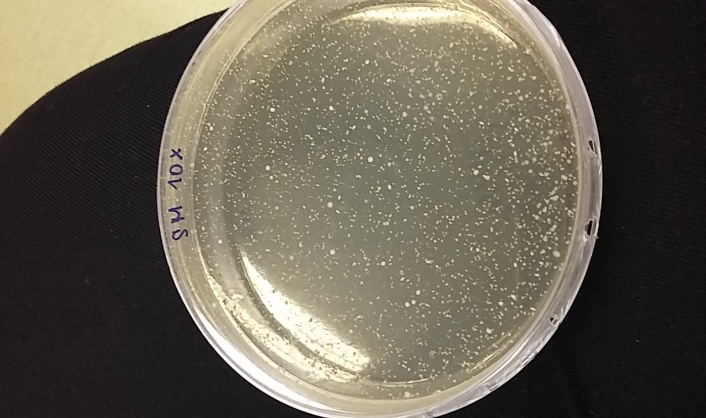 |
| --- | --- | --- |
| *Lactobacilus acidophilus* | *Bifidobacterium breve* | Commercial probiotic mixture |

**Figure S1:** Bacteria *Lactobacilus acidophilus*, *Bifidobacterium breve* and commercial probiotic mixture cultivated for 48 hours in MRS agar

Note: During analysis of viability by cultivation method, cells in model and real samples were diluted to approx. 104 cells, placed on Petri dish and over-layered by agar medium to reduce oxygen presence.


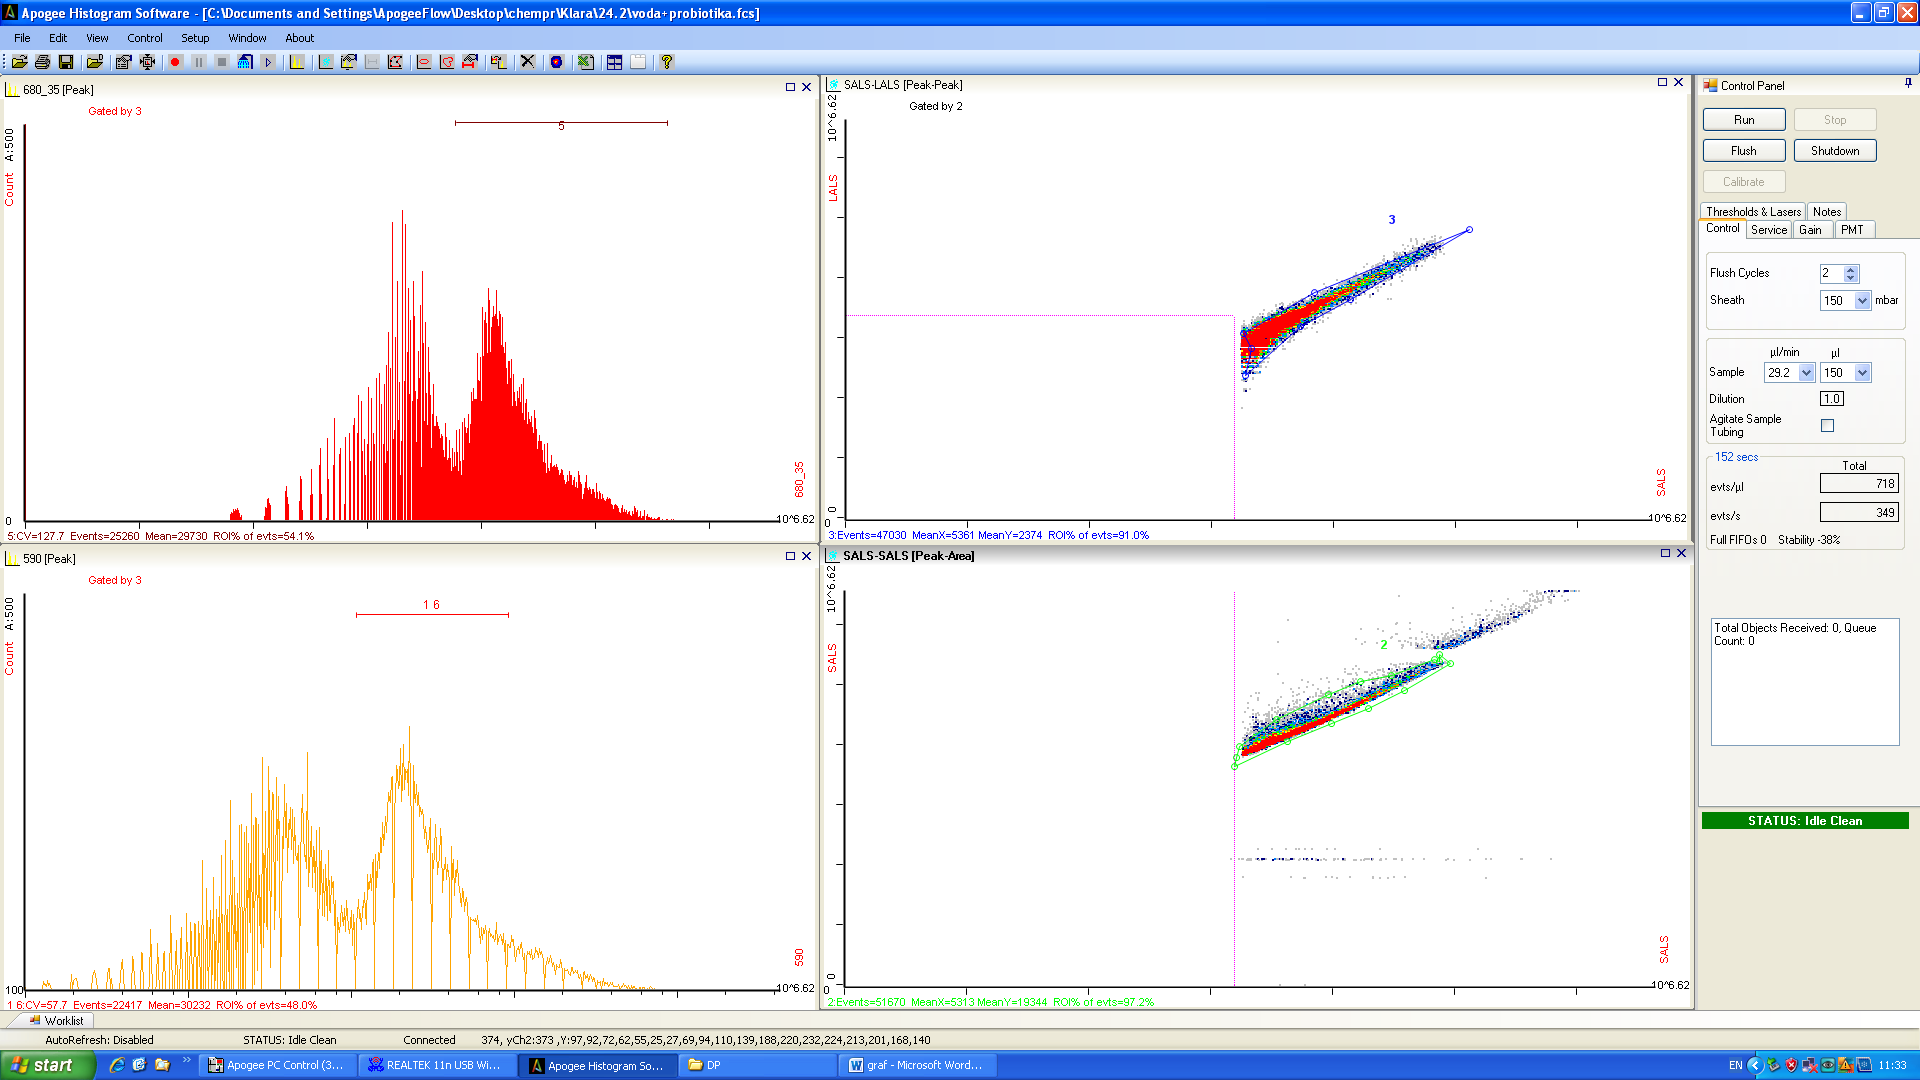


**Figure S2.** Viability of probiotics analyzed by flow cytometry – results of analysis of commercial probiotic mixture incubated in water medium.
